# Supplementary material for: High Phosphate Induces and Klotho Attenuates Kidney Epithelial Senescence and Fibrosis
Source: PubMed Central journal article supplement (PMC7468469; doi:10.3389/fphar.2020.01273), 2020-08-20
Supplement: DataSheet_1.pdf [file DataSheet_1.pdf]

# High phosphate induces and Klotho attenuates kidney epithelial senescence and fibrosis

Jenny Maique<sup>1</sup>, Brianna Flores<sup>1</sup>, Mingjun Shi<sup>1</sup>, Sierra Shepard<sup>1</sup>, Zhiyong Zhou<sup>1</sup>,  
Shirely Yan<sup>3</sup>, Orson W. Moe<sup>1,2,4</sup>, Ming Chang Hu<sup>1,2,\*</sup>

<sup>1</sup>Charles and Jane Pak Center for Mineral Metabolism and Clinical Research  
Departments of <sup>2</sup>Internal Medicine, <sup>3</sup>Pathology, and <sup>4</sup>Physiology  
University of Texas Southwestern Medical Center, Dallas, TX, USA

**Running title:** Klotho and phosphate in senescence and kidney fibrosis

**\* Correspondence:**

Ming Chang Hu, M.D.; Ph.D.

Charles and Jane Pak Center for Mineral Metabolism and Clinical Research

Department of Internal Medicine

The University of Texas Southwestern Medical Center

5323 Harry Hines Blvd., Dallas, TX 75390 USA

Email: [ming-chang.hu@utsouthwestern.edu](mailto:ming-chang.hu@utsouthwestern.edu)

## SUPPLEMENTAL FIGURE LEGENDS

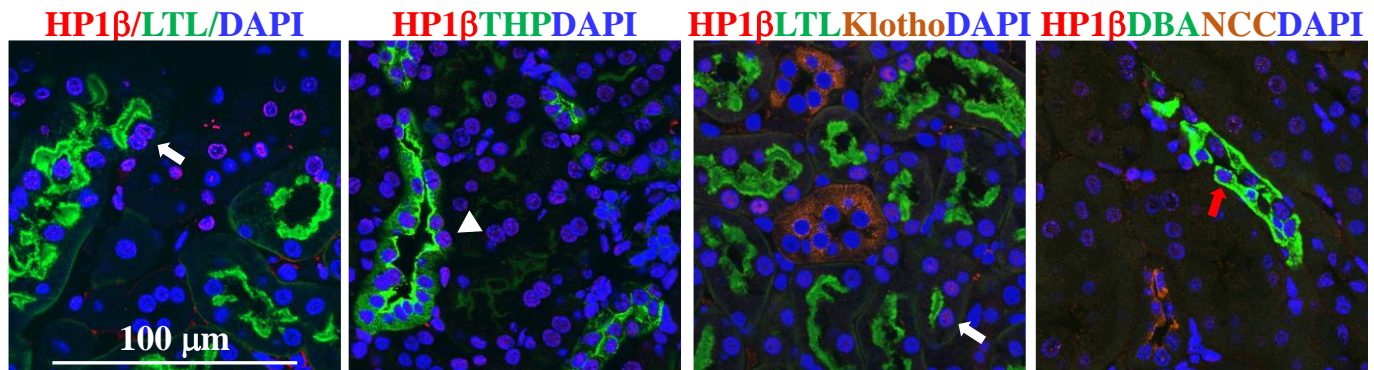

**Supplemental Figure 1** Co-immunostaining for HP1 $\beta$  (red) with different kidney tubular markers and DAPI for nuclear stain (blue) in the kidneys of *WT* mice at 12 weeks old. Immunostaining was performed in at least three independent experiments showing similar results. **Far left panel:** Representative images of HP1 $\beta$ , LTL (marker for proximal tubule-PT, green) and DAPI; **middle left panel:** Representative images of HP1 $\beta$ , THP (marker for thick ascending limb of loop of Henle-TAL, green) and DAPI; **middle right panel:** Representative images of HP1 $\beta$ , LTL (marker for PT, green); Klotho (marker for distal tubule-DT, brown) and DAPI; and **far right panel:** Representative images of HP1 $\beta$ , DBA (marker for collecting duct-CD, green), NCC (marker for DT, brown) and DAPI. White arrows depict HP1 $\beta$  in PT, white arrow head in TAL, and red arrow in CD.

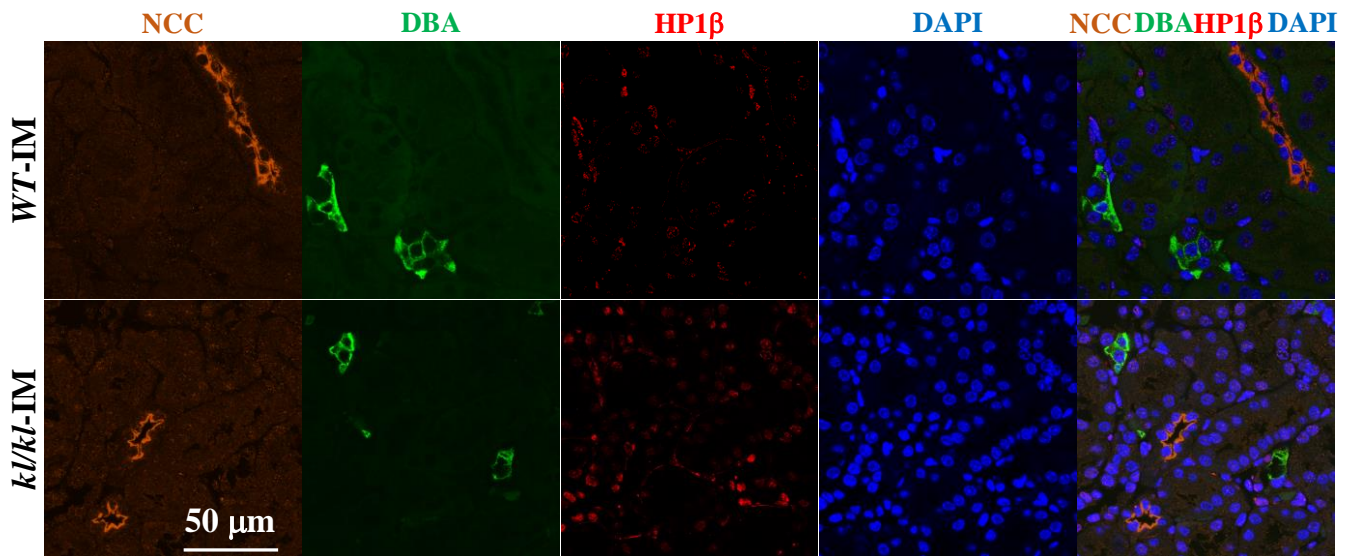

**Supplemental Figure 2** Co-localization of HP1 $\beta$  (red) in distal tubules stained with NCC (brown), collecting ducts stained with DBA (green) in inner medulla (IM) of kidneys from *WT* and *kl/kl* mice at 6-week old. DAPI (blue): nuclear stain.

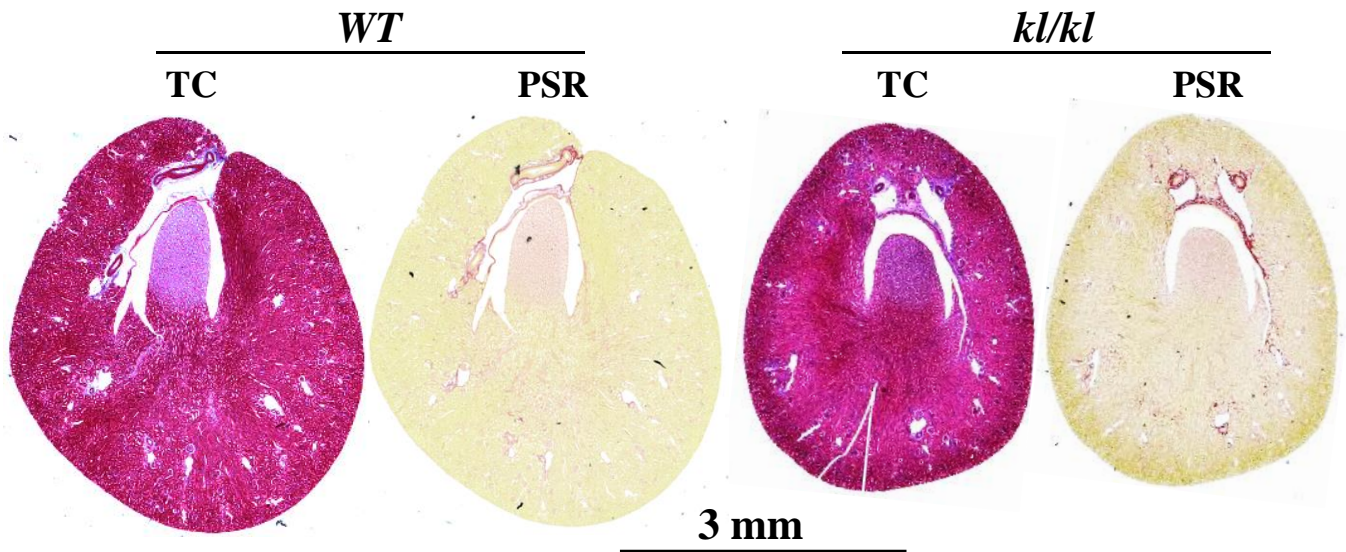

**Supplemental Figure 3** Massive tubulointerstitial fibrosis in *kl/kl* mice compared to *WT* mice fed with normal Pi diet and sacrificed at 6 weeks old. Trichrome (TC) stain and picro-sirius red (PSR) stain in kidney sections of *WT* mice (**left panel**) and *kl/kl* mice (**right panel**).

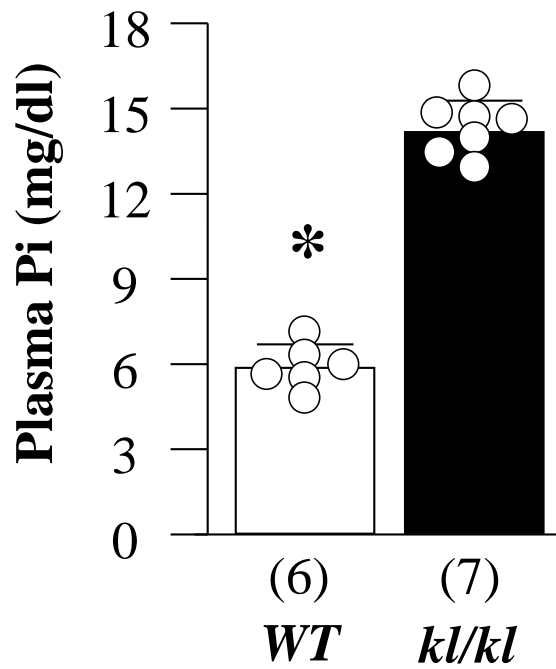

**Supplemental Figure 4** High plasma Pi in *kl/kl* mice than in *WT* fed with normal Pi diet at 6 weeks old. Sample number in each group is shown in bracket underneath corresponding bar. Data are presented as mean  $\pm$  S.D. with scatter plots of individual data points. \* $P < 0.05$ , \*\* $P < 0.01$  between two genotypes by un-paired Student t test.

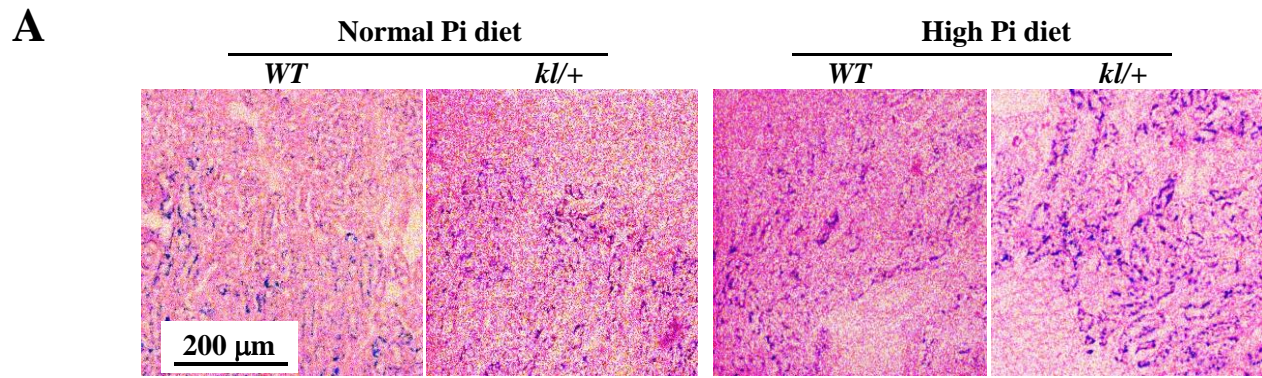

**B**

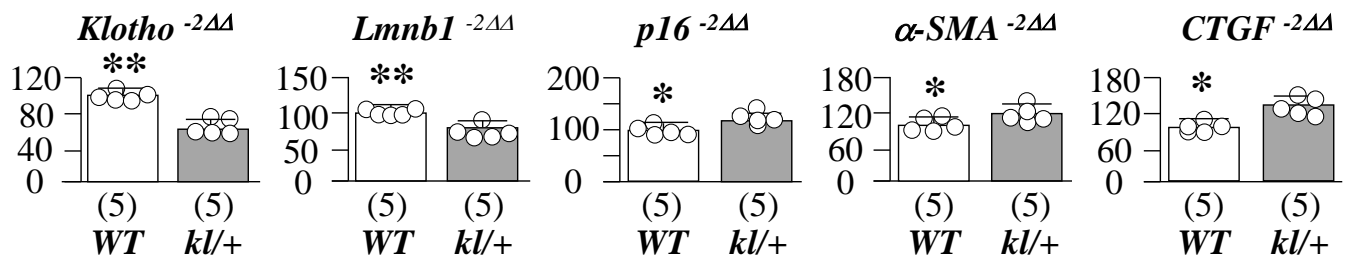

**Supplemental Figure 5** WT mice and *kl/+* mice were fed with normal or high dietary phosphate chow for 12 weeks. (A) SA-β-gal stain was performed in the kidney sections. Representative microscopic images of SA-β-gal stain. (B) Quantitative analysis of transcripts of *Klotho*, senescence markers (*Lmnbl* and *p16*), and fibrotic markers (*α-SMA*, and *CTGF*) in the kidneys of WT and *kl/+* mice at 12 weeks old were fed with 12-week high phosphate diet. Sample number in each group is presented in bracket underneath corresponding bar. Data are presented as mean ± S.D. with scatter plots of individual data points. \*P<0.05, \*\*P<0.01 between two genotypes by un-paired Student t test.



**A**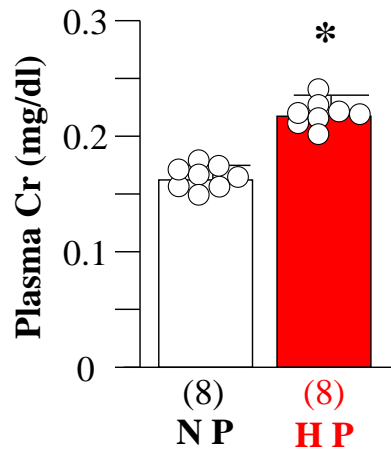**B**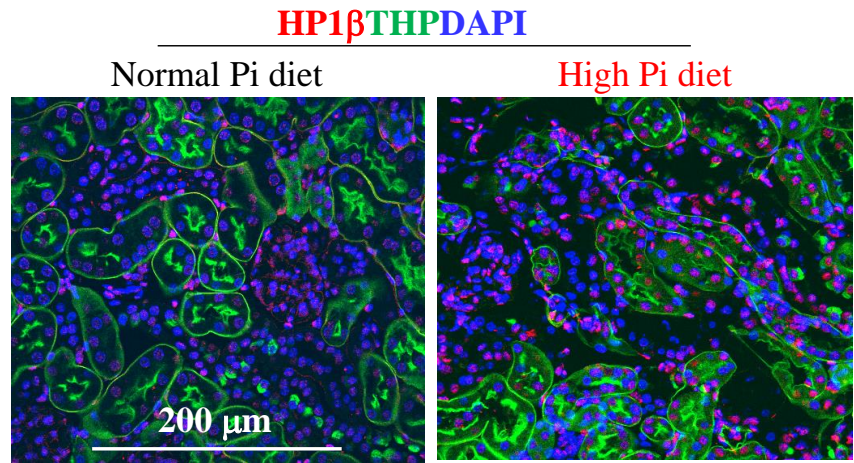

**Supplemental Figure 6** High Pi promotes cellular senescence in the kidney and accelerates kidney deterioration in CKD mice. *WT* mice at 12 weeks old underwent to CKD induction surgery and were fed with normal or high Pi diet for 12 weeks starting 2 weeks after CKD induction. (A) Plasma Cr. Sample number in each group is shown in bracket underneath corresponding bar. Data represented as mean  $\pm$  S.D. with scatter plots of individual data points. \* $P < 0.05$  between two genotypes by un-paired Student t test. (B) Immunohistochemistry for HP1 $\beta$  (red), THP (TAL marker, green), and DAPI (blue) in the kidney sections.

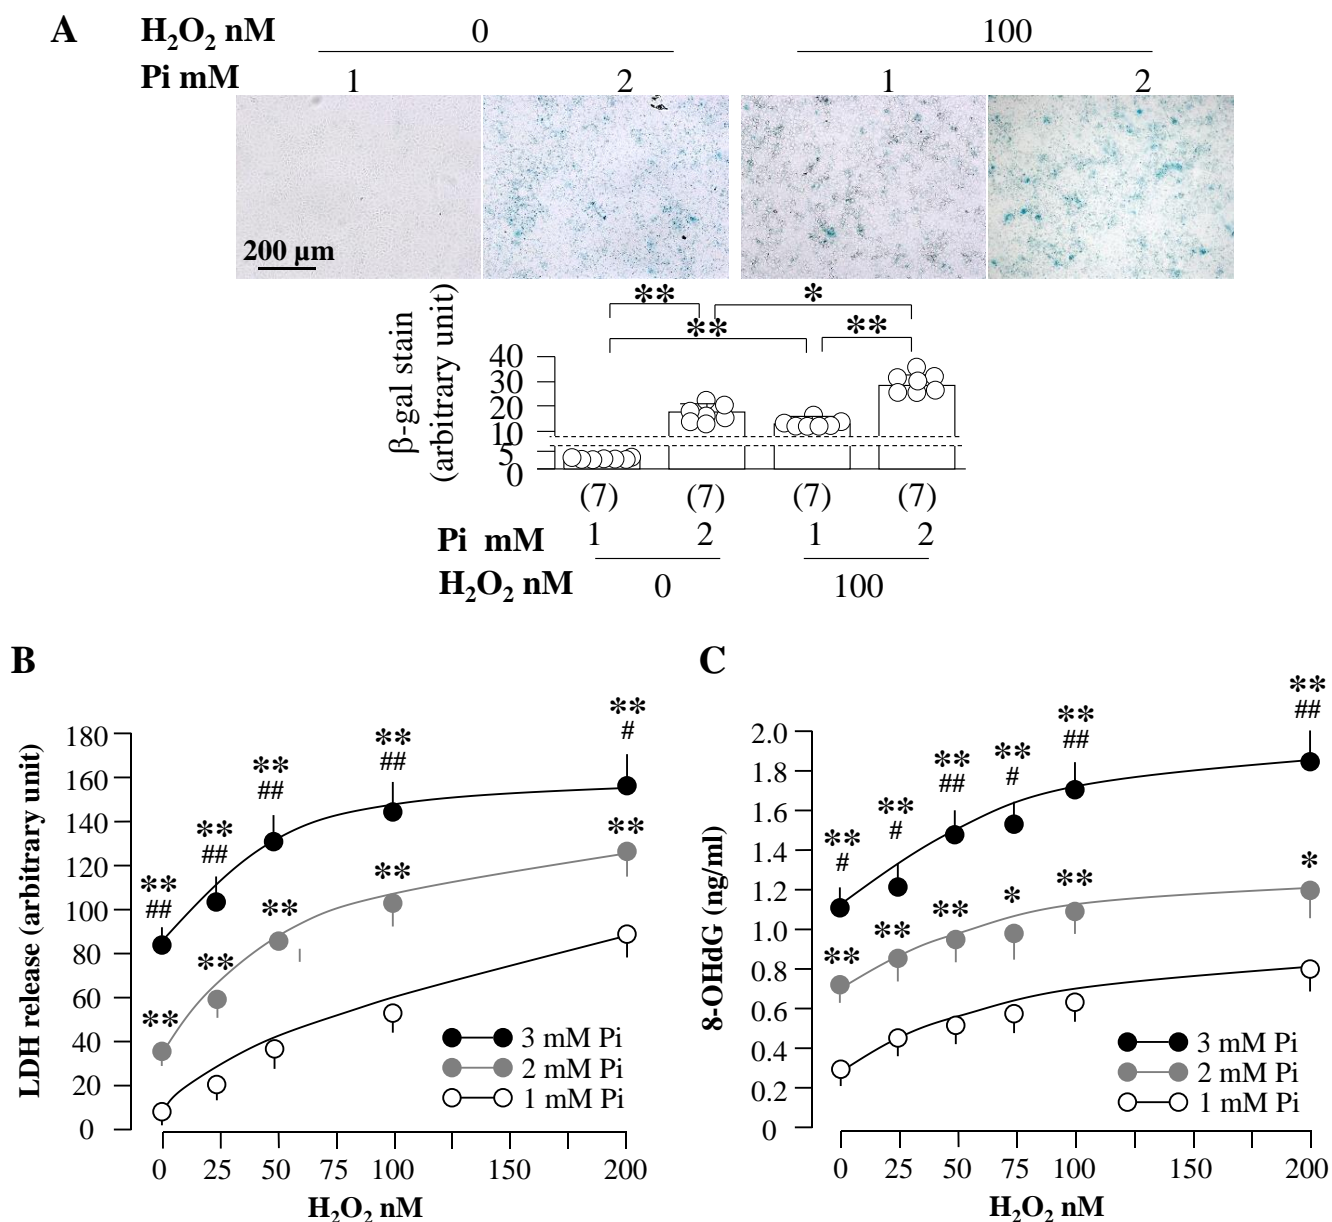

**Supplemental Figure 7** High Pi exacerbates H<sub>2</sub>O<sub>2</sub>-induced senescence and cell injury. NRK cells were seeded in 6-well plates and treated with Pi for 72 hours. After 24 hours of Pi incubation, the cells were treated with H<sub>2</sub>O<sub>2</sub> for 48 hours. **(A)** SA-β-gal stain in the cells with eosin as the counter stain. **Upper panel:** Representative images of SA-β-gal stain; **bottom panel:** Quantitative score of SA-β-gal stain. Sample number in each group is presented in bracket underneath corresponding bar. Data are presented as mean ± S.D. with scatter plots of individual data points. \*P<0.05, \*\*P<0.01 between two groups by two-way ANOVA followed by Student-Newman-Keuls *post hoc* test. **(B)** LDH and **(C)** 8-OHdG concentration in cultured media collected from NRK cells treated with Pi or/and H<sub>2</sub>O<sub>2</sub>. Each time point had seven samples. Data are presented as mean ± S.D. \*P<0.05, \*\*P<0.01 vs 1 mM Pi; #P<0.05 vs 2 mM Pi at same dose of H<sub>2</sub>O<sub>2</sub> by one-way ANOVA followed by Student-Newman-Keuls *post hoc* test.



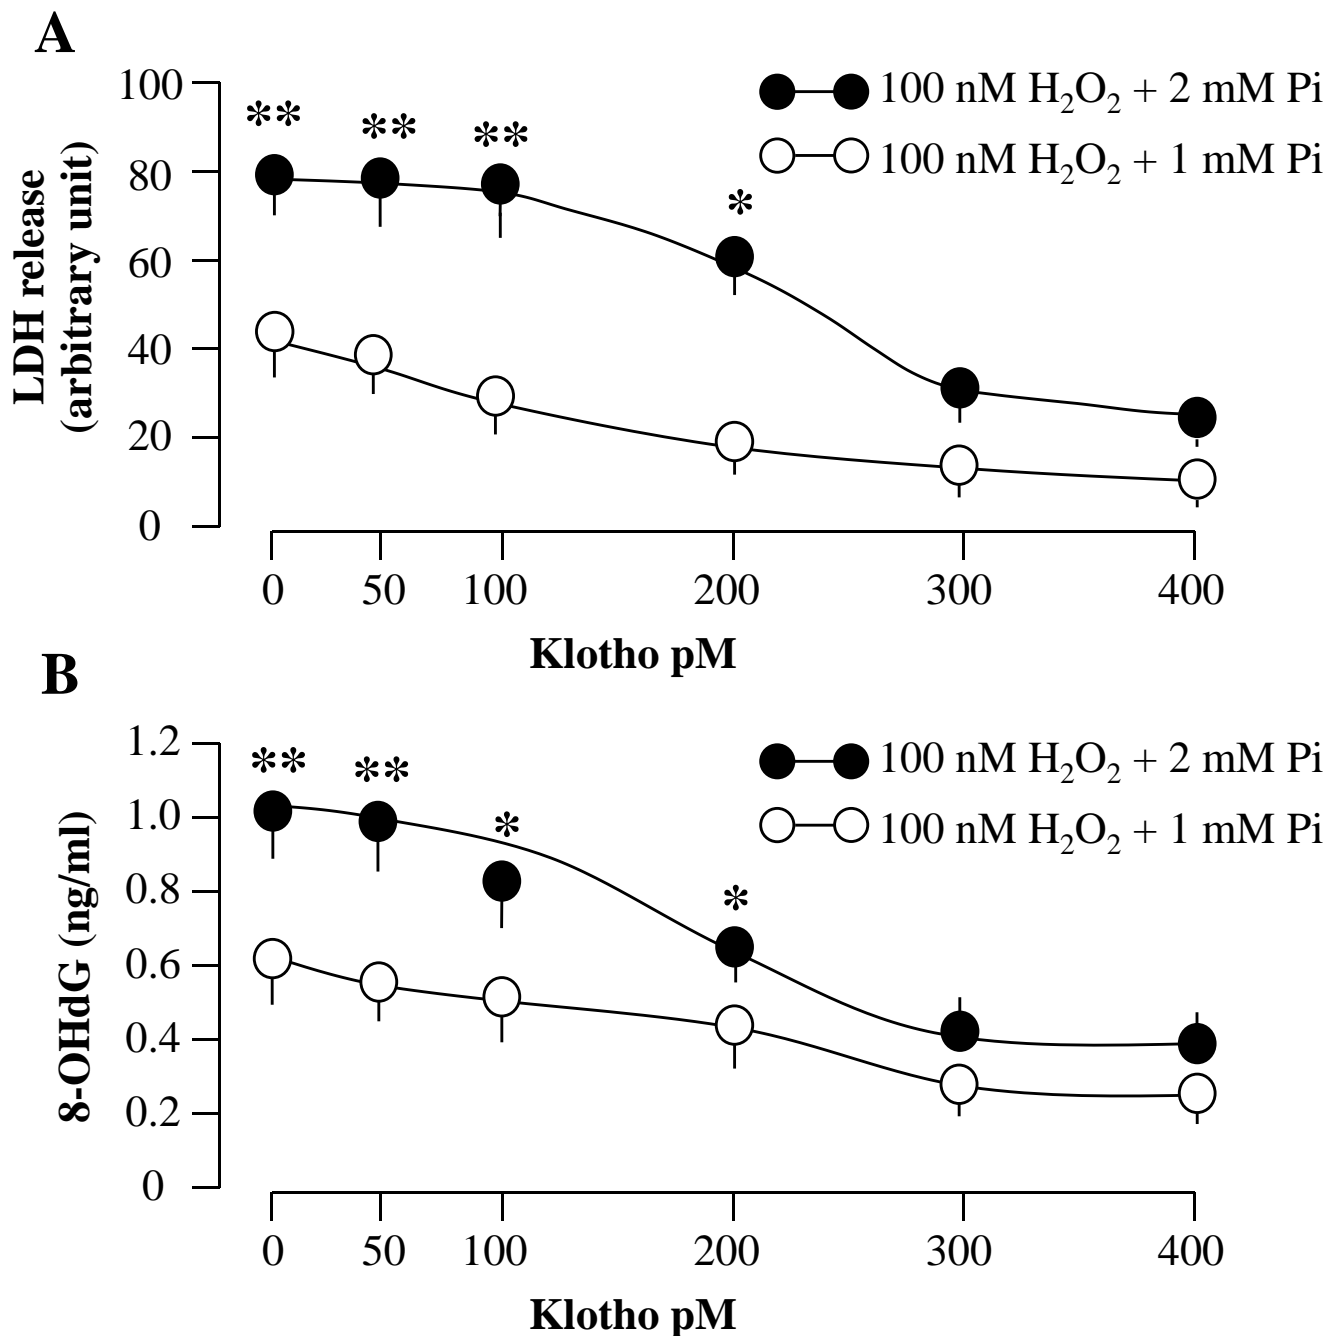

**Supplemental Figure 8** Klotho inhibits high Pi-induced senescence *in vitro*. NRK cells were seeded in 6-well plates and treated with 2 mmol/l Pi, Klotho or vehicle (PBS) for 72 hours. (A) LDH and (B) 8-OHdG concentration in cultured media collected from NRK cells. Each time point has seven samples. Data are presented as mean  $\pm$  S.D. \* $P < 0.05$ , \*\* $P < 0.01$  between 100 nM H<sub>2</sub>O<sub>2</sub> + 1 mM Pi and 100 nM H<sub>2</sub>O<sub>2</sub> + 2 mM Pi at same dose of Klotho by unpaired Student t test.

p21KlothoLTLDAPI

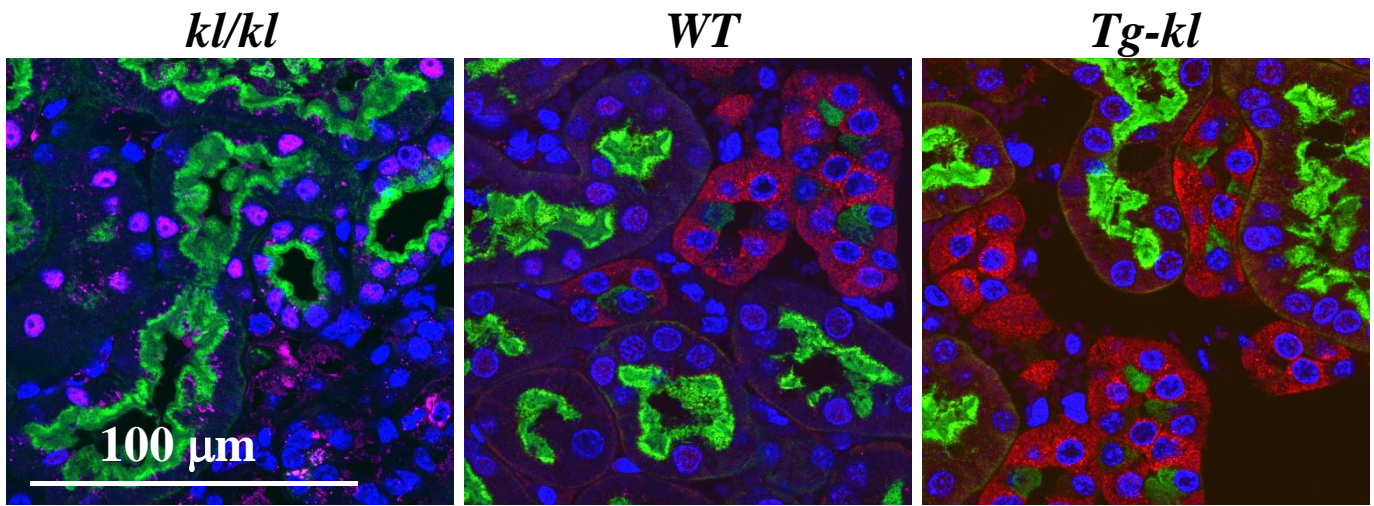

**Supplemental Figure 9** The senescence in the kidneys of *kl/kl*, *WT*, and *Tg-kl* fed with normal Pi diet at 6 weeks old. Co-immunohistochemistry for senescence markers in kidney sections. Representative images for p21 (pink), Klotho (red), LTL (green), and DAPI (blue) in kidney sections..

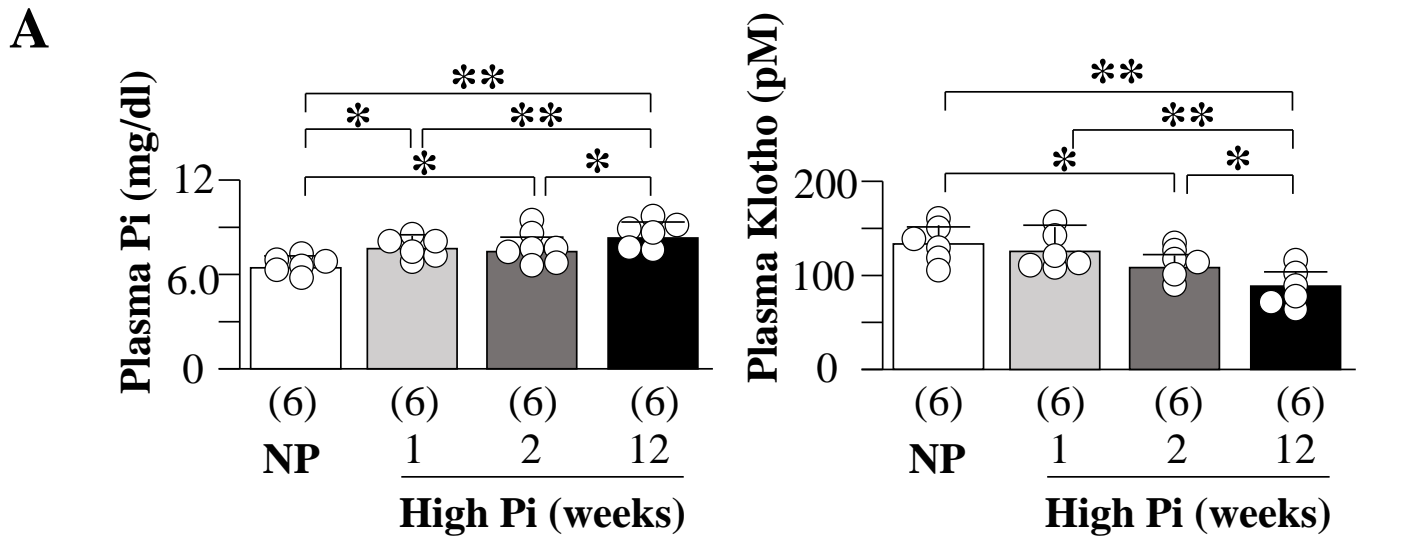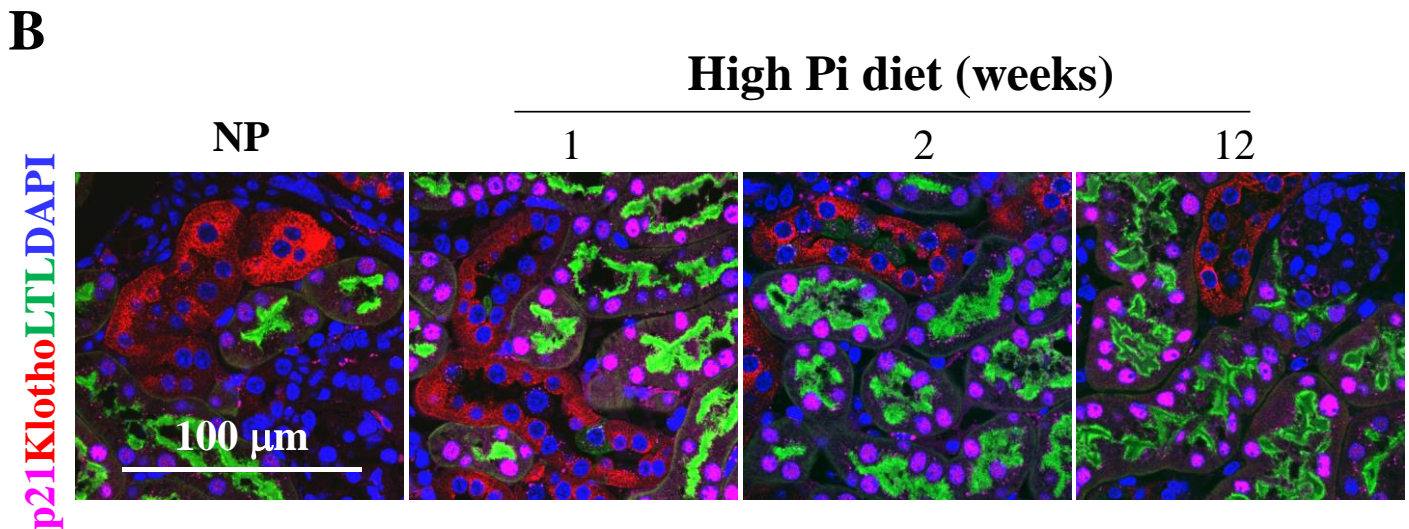

**Supplemental Figure 10** High Pi diet increases plasma Pi and decreases plasma Klotho. *WT* mice at 12 weeks old were fed with normal or high Pi diet for 1, 2 or 12 weeks. **(A)** Plasma Pi (**left panel**) and Klotho (**right panel**). Sample number in each group is shown in bracket underneath corresponding bar. Data are presented as mean  $\pm$  S.D. with scatter plots of individual data points. \* $P < 0.05$ , \*\* $P < 0.01$  between any two groups by one-way ANOVA followed by Student-Newman-Keuls *post hoc* test. **(B)** Representative microscopic images of co-immunostaining for p21 (pink), Klotho (red), LTL (green), and DAPI (blue) in kidney sections of *WT* mice fed with different Pi diets.

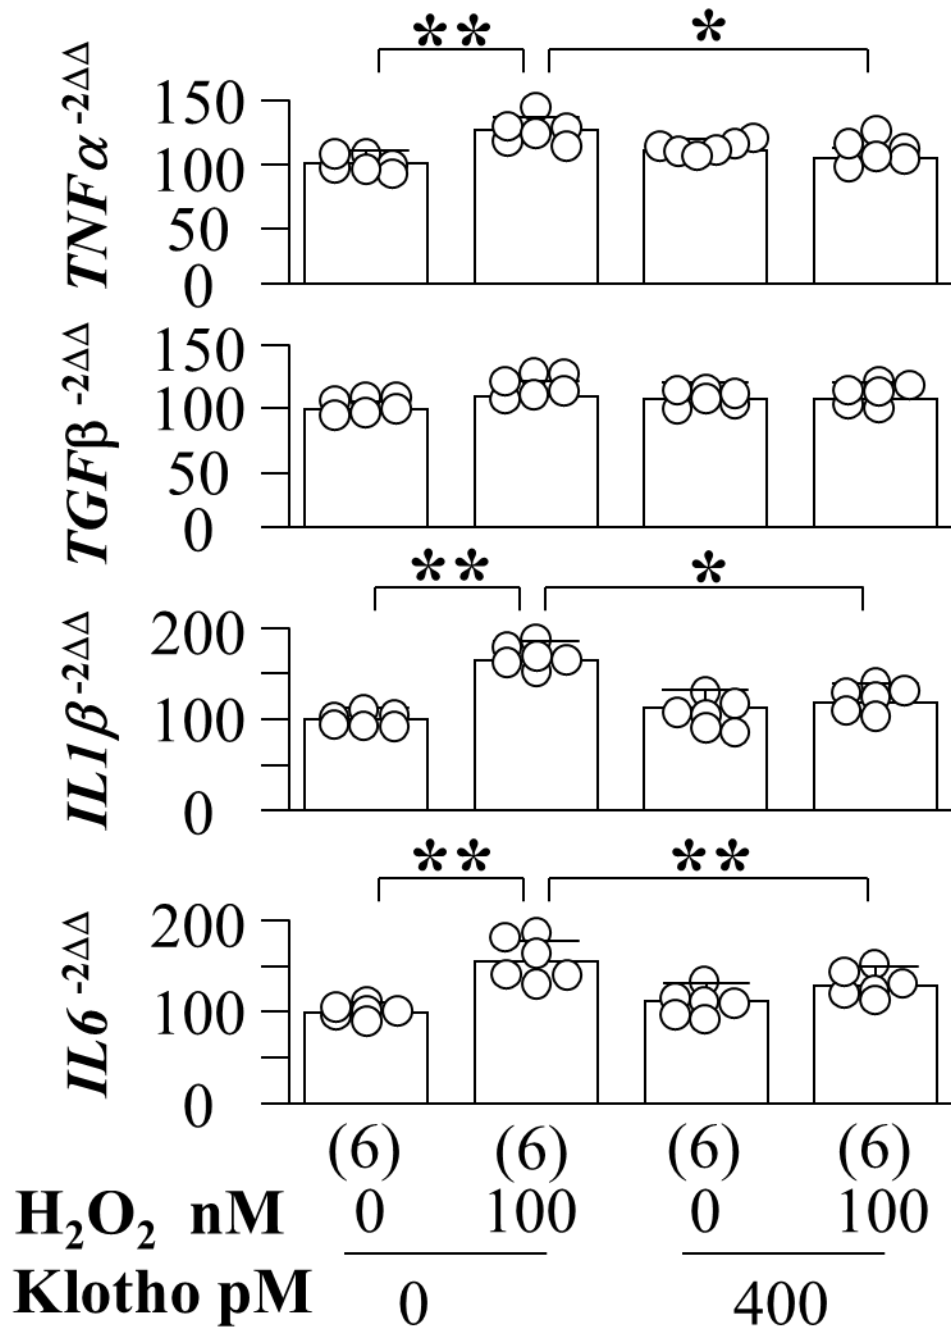

**Supplemental Figure 11** Pi and Klotho regulate the senescence-associated secretory phenotype (SASP). NRK cells were treated with Pi,  $H_2O_2$ , or Klotho for 48 hours, and harvested for quantitative measurement of  $TNF\alpha$ ,  $TGF\beta$ ,  $IL1\beta$ , and  $IL6$  mRNA with qPCR. Sample number in each group is presented in bracket underneath corresponding bar. Data are presented as mean  $\pm$  S.D. with scatter plots of individual data points. \* $P < 0.05$ , \*\* $P < 0.01$  between two groups by two-way ANOVA followed by Student-Newman-Keuls *post hoc* test.
